# Supplementary material for: Korarchaeota Diversity, Biogeography, and Abundance in Yellowstone and Great Basin Hot Springs and Ecological Niche Modeling Based on Machine Learning
Source: PubMed Central journal article supplement (PMC3344838; doi:10.1371/journal.pone.0035964), 2012-05-04

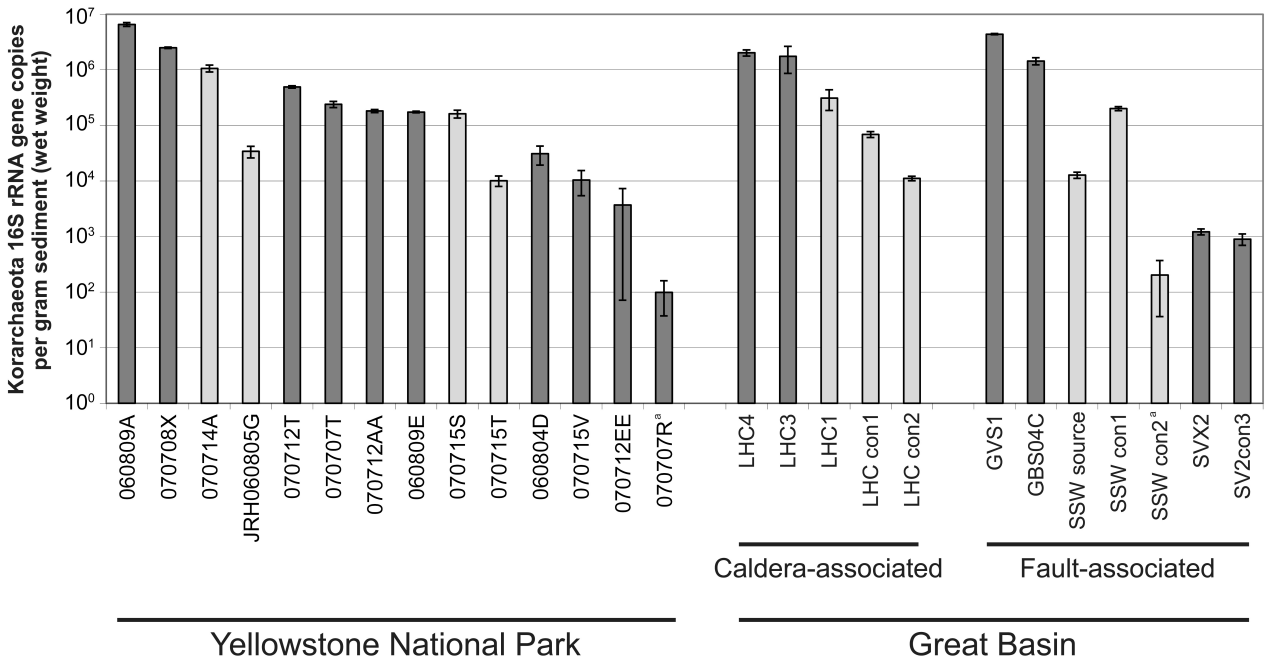

Supplement: pone.0035964.s001.pdf [file pone.0035964.s001.pdf]
