# Supplementary material for: Korarchaeota Diversity, Biogeography, and Abundance in Yellowstone and Great Basin Hot Springs and Ecological Niche Modeling Based on Machine Learning
Source: PubMed Central journal article supplement (PMC3344838; doi:10.1371/journal.pone.0035964), 2012-05-04

118°50'40"W

118°50'35"W

**Korarchaeota Abundance**

- Non-permissive
- Marginal (<10<sup>4</sup> cells/g)
- Sub-optimal (10<sup>4</sup> - 10<sup>5</sup> cells/g)
- Optimal (>10<sup>5</sup> cells/g)

**Temperature Profile**



High temp : 83°C

Low temp : 33°C

37°41'25"N

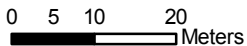

Little Hot Creek, Great Basin, California

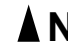

Supplement: pone.0035964.s002.pdf [file pone.0035964.s002.pdf]
